# Supplementary material
Source: Research Square preprint supplement (doi:10.21203/rs.3.rs-8439132/v1)
Supplement: Supplementary file 1 [file dc83e45ac07135fd139533bd.xlsx]

## Sheet: Sheet1
gene_id
